# Supplementary material for: Immunization with a 22-kDa outer membrane protein elicits protective immunity to multidrug-resistant Acinetobacter baumannii
Source: PubMed Central journal article supplement (PMC4745112; doi:10.1038/srep20724), 2016-02-08
Supplement: srep20724-s1.pdf [file srep20724-s1.pdf]

1 **Immunization with a 22-kDa outer membrane protein elicits protective**  
2 **immunity to multidrug-resistant *Acinetobacter baumannii***

3

4 **Weiwei Huang<sup>1,2,3</sup>, Yufeng Yao<sup>1,2,3</sup>, Shijie Wang<sup>1,2,3</sup>, Ye Xia<sup>1,2,3</sup>, Xu Yang<sup>1,2,3</sup>, Qiong Long<sup>1,2,3</sup>, Wenjia**  
5 **Sun<sup>1,2,3</sup>, Cunbao Liu<sup>1,2,3</sup>, Yang Li<sup>1,2,3</sup>, Xiaojie Chu<sup>1,2,3</sup>, Hongmei Bai<sup>1,2,3</sup>, Yueting Yao<sup>1,2,3</sup>, Yanbing**  
6 **Ma<sup>1,2,3\*</sup>**

7 **1** Laboratory of Molecular Immunology, Institute of Medical Biology, Chinese Academy of Medical  
8 Sciences & Peking Union Medical College; Kunming, China 650118,

9 **2** Yunnan Key Laboratory of Vaccine Research & Development on Severe Infectious Diseases; Kunming,  
10 China 650118,

11 **3** Yunnan Engineering Research Center of Vaccine Research and Development on Severe Infectious  
12 Diseases, Kunming, China 650118

13

14 **\*Corresponding:**

15 Prof. Yanbing Ma

16 Laboratory of Molecular Immunology,

17 Institute of Medical Biology,

18 Chinese Academy of Medical Sciences & Peking Union Medical College,

19 Kunming, China 650118

20 Email: [yanbingma1969@126.com](mailto:yanbingma1969@126.com)

21 Tel: +86 871 68339287

22

23 **Supplementary figure legends**

24 **Supplementary figure 1. Bioinformatics analysis of Omp22**

25 (A) Amino acid domain analyses on Omp22. The picture showed that a glycine zipper on the position of  
26 37-81 (blue), and a peptidoglycan (PG) binding domains similar to the C-terminal domain of  
27 outer-membrane protein OmpA (OmpA\_C-like) (green) on the position of 110-213. (B) Omp22 was  
28 homology modeled *in silico* by using the SWISS-MODEL automated protein structure homology  
29 modeling server. (C) Bacterial outer membrane vesicles (OMVs) production model. Overview of  
30 Gram-negative envelope architecture in the context of OMVs production. “Free” or “bound” forms of  
31 lipoprotein (red), porin (green) and outer membrane proteins (yellow) have been showed in picture.

33 **Supplementary Figure 1**

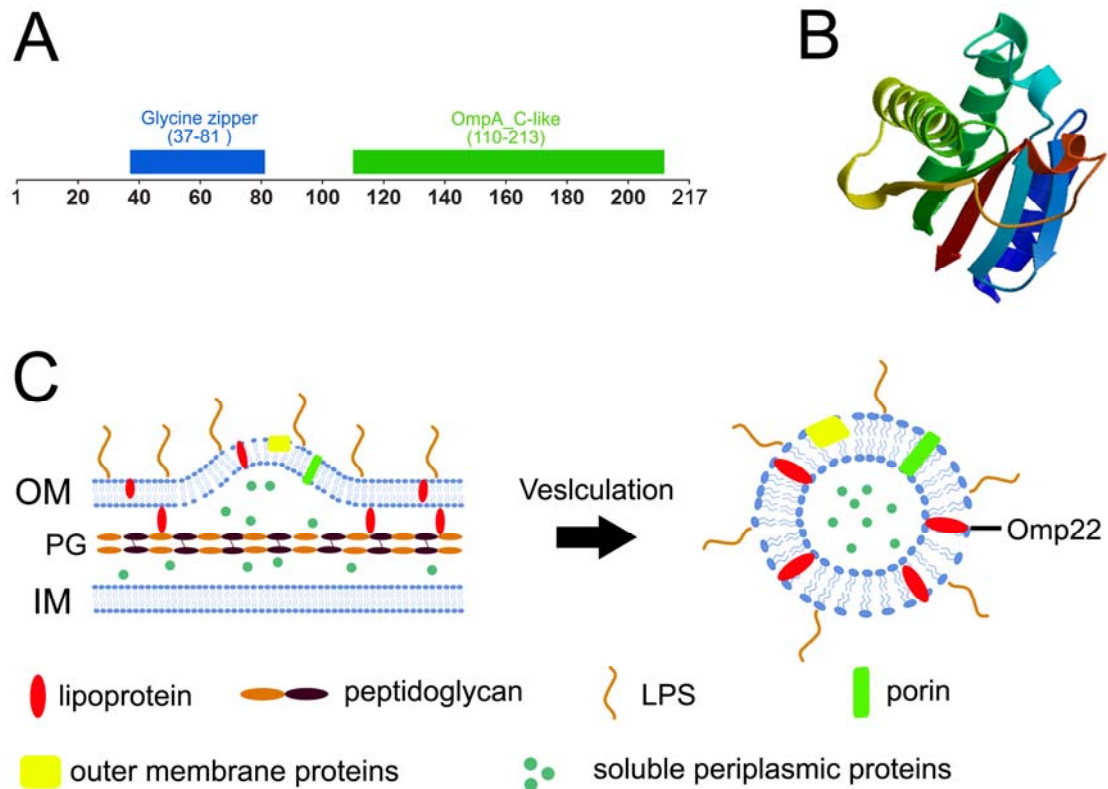

34
